# Supplementary material for: Optimizing treatment goals for long-term health outcomes among patients with type 2 diabetes mellitus
Source: PubMed Central journal article supplement — BMJ Open Diabetes Res Care. 2021 Oct 21;9(1):e002396. doi: 10.1136/bmjdrc-2021-002396 (PMC8532550; doi:10.1136/bmjdrc-2021-002396), 2021-10-21
Supplement: bmjdrc-2021-002396supp001.pdf [file bmjdrc-2021-002396supp001.pdf]

## Appendix A: Outcome Definitions

| Diseases                                     | ICD-9-CM<br>Diagnosis Codes | Description                                               | ICD-10-CM<br>Diagnosis Codes | Description                                                                 |
|----------------------------------------------|-----------------------------|-----------------------------------------------------------|------------------------------|-----------------------------------------------------------------------------|
| <b>Microvascular complications</b>           |                             |                                                           |                              |                                                                             |
| <b>Retinopathy</b>                           |                             |                                                           |                              |                                                                             |
|                                              | 250.5x                      | Diabetes with ophthalmic manifestations                   | E08.3%                       | Diabetes mellitus due to underlying condition with ophthalmic complications |
| Diabetic ophthalmologic disease              | 362.0x                      | Diabetic retinopathy                                      | E10.3%                       | Type 1 diabetes mellitus with ophthalmic complications                      |
|                                              |                             |                                                           | E11.3%                       | Type 2 diabetes mellitus with ophthalmic complications                      |
|                                              |                             |                                                           | E13.3%                       | Other specified diabetes mellitus with ophthalmic complications             |
| Background retinopathy                       | 362.1x                      | Other background retinopathy and retinal vascular changes | H35.0%                       | Background retinopathy and retinal vascular changes                         |
| Other non-diabetic proliferative retinopathy | 362.1x                      | Other background retinopathy and retinal vascular changes | H35.2%                       | Other non-diabetic proliferative retinopathy                                |
|                                              |                             |                                                           | H35.4%                       | Peripheral retinal degeneration                                             |
|                                              |                             |                                                           | H35.7%                       | Separation of retinal layers                                                |
|                                              |                             |                                                           | H35.8%                       | Other specified retinal disorders                                           |
| Retinal edema                                | 362.83                      | Retinal edema                                             | H35.81%                      | Retinal edema                                                               |
| CSME                                         | 362.53                      | Cystoid macular degeneration                              | H35.35%                      | Cystoid macular degeneration                                                |
| Other retinal disorders                      | 362.81                      | Retinal hemorrhage                                        | H35.9%                       | Unspecified retinal disorder                                                |
|                                              | 362.82                      | Retinal exudates and deposits                             |                              |                                                                             |
| Proliferative diabetic                       | 362.02                      | Proliferative diabetic retinopathy                        | H35.2%                       | Other non-diabetic proliferative                                            |

| retinopathy                |        | retinopathy                                         |                                    |                                                                         |
|----------------------------|--------|-----------------------------------------------------|------------------------------------|-------------------------------------------------------------------------|
|                            |        |                                                     | E08.35%, E10.35%, E11.35%, E13.35% | proliferative diabetic retinopathy in diabetes mellitus                 |
| Retinal detachment         | 361.xx | Retinal detachments and defects                     | H33.0%                             | Retinal detachments and breaks                                          |
|                            |        |                                                     | H33.2%                             | Serous retinal detachment                                               |
| Blindness                  | 369.xx | Blindness and low vision                            | H54.0%                             | Blindness, both eyes                                                    |
|                            |        |                                                     | H54.1%                             | Blindness, one eye, low vision other eye                                |
|                            |        |                                                     | H54.4%                             | Blindness, one eye                                                      |
|                            |        |                                                     | H54.8%                             | Legal blindness, as defined in USA                                      |
| Vitreous hemorrhage        | 379.23 | Vitreous hemorrhage                                 | H43.1%                             | Vitreous hemorrhage                                                     |
| <b>Nephropathy</b>         |        |                                                     |                                    |                                                                         |
|                            |        |                                                     | E08.2%                             | Diabetes mellitus due to underlying condition with kidney complications |
| Diabetic nephropathy       | 250.4x | Diabetes with renal manifestations                  | E10.2%                             | Type 1 diabetes mellitus with kidney complications                      |
|                            |        |                                                     | E11.2%                             | Type 2 diabetes mellitus with kidney complications                      |
|                            |        |                                                     | E13.2%                             | Other specified diabetes mellitus with kidney complications             |
| Acute glomerulonephritis   | 580.xx | Acute glomerulonephritis                            | N00.%                              | Acute nephritic syndrome                                                |
| Nephrotic syndrome         | 581.xx | Nephrotic syndrome                                  | N04.%                              | Nephrotic syndrome                                                      |
| Hypertension, nephrosis    | 581.81 | Nephrotic syndrome in diseases classified elsewhere | I12.%                              | Hypertensive chronic kidney disease                                     |
|                            |        |                                                     | I13.%                              | Hypertensive heart and chronic kidney disease                           |
| Chronic glomerulonephritis | 582.xx | Chronic glomerulonephritis                          | N03.%                              | Chronic nephritic syndrome                                              |

|                                            |                        |                                                                                 |                                       |                                                                                                                                               |
|--------------------------------------------|------------------------|---------------------------------------------------------------------------------|---------------------------------------|-----------------------------------------------------------------------------------------------------------------------------------------------|
| Unspecified Nephritis/nephropathy          | 583.xx                 | Nephritis and nephropathy, not specified as acute or chronic                    | N05.%                                 | Unspecified nephritic syndrome                                                                                                                |
| Chronic kidney disease (CKD)               | 585.xx                 | Chronic kidney disease (CKD)                                                    | N18.%                                 | Chronic kidney disease (CKD)                                                                                                                  |
| Renal failure                              | 586.xx                 | Unspecified renal failure                                                       | N19.%                                 | Unspecified kidney failure                                                                                                                    |
| Renal insufficiency                        | 593.9x                 | Unspecified disorder of kidney and ureter                                       | N28.9%                                | Disorder of kidney and ureter, unspecified                                                                                                    |
|                                            |                        |                                                                                 | N18.9%                                | Chronic kidney disease, unspecified                                                                                                           |
| <b>Neuropathy</b>                          |                        |                                                                                 |                                       |                                                                                                                                               |
| Diabetic neuropathy                        | 250.6x                 | Diabetes with neurological manifestations                                       | E08.4%                                | Diabetes mellitus due to underlying condition with neurological complications                                                                 |
|                                            | 356.9x                 | Unspecified, Hereditary and idiopathic peripheral neuropathy                    | E10.4%                                | Type 1 diabetes mellitus with neurological complications                                                                                      |
|                                            |                        |                                                                                 | E11.4%                                | Type 2 diabetes mellitus with neurological complications                                                                                      |
|                                            |                        |                                                                                 | E13.4%                                | Other specified diabetes mellitus with neurological complications                                                                             |
| Amyotrophy (nondiabetic)                   | 358.1x                 | Myasthenic syndromes in diseases classified elsewhere                           | G12.21%                               | Amyotrophic lateral sclerosis                                                                                                                 |
|                                            |                        |                                                                                 | G54.5%                                | Neuralgic amyotrophy                                                                                                                          |
| Cranial nerve palsy (including ophthalmic) | 951.0x, 951.1x, 951.3x | Injury to oculomotor nerve; Injury to trochlear nerve; Injury to abducens nerve | G51.0%, G52.%, H49.0%, H49.1%, H49.2% | Bell's palsy; Disorders of other cranial nerves; Third [oculomotor] nerve palsy; Fourth [trochlear] nerve palsy; Sixth [abducent] nerve palsy |
| Mononeuropathy                             | 354.xx                 | Mononeuritis of upper limb and mononeuritis multiplex                           | G56.%                                 | Mononeuropathies of upper limb                                                                                                                |

|                                    |        |                                                                   |                                             |                                                                                     |
|------------------------------------|--------|-------------------------------------------------------------------|---------------------------------------------|-------------------------------------------------------------------------------------|
|                                    | 355.xx | Mononeuritis of lower limb and unspecified site                   | G57.%                                       | Mononeuropathies of lower limb                                                      |
|                                    |        |                                                                   | G58.%                                       | Other mononeuropathies                                                              |
|                                    |        |                                                                   | G59.%                                       | Mononeuropathy in diseases classified elsewhere                                     |
| Charcot's arthropathy              | 713.5x | Arthropathy associated with neurological disorders                | E08.610, E09.610, E10.610, E11.610, E13.610 | Charcot's joint in diabetes mellitus (E08, E10-E13 with .610)                       |
|                                    |        |                                                                   | M14.6%                                      | Charcot's joint - Excludes Charcot's joint in diabetes mellitus (E08-E13 with .610) |
|                                    | 357.2x | Polyneuropathy in diabetes                                        | E08.42, E09.42, E10.42, E11.42, E13.42      | polyneuropathy in diabetes mellitus (E08-E13 with .42)                              |
|                                    |        |                                                                   | G61.%                                       | Inflammatory polyneuropathy                                                         |
| Polyneuropathy                     |        |                                                                   | G62.%                                       | Other and unspecified polyneuropathies                                              |
|                                    |        |                                                                   | G63.%                                       | Polyneuropathy in diseases classified elsewhere                                     |
|                                    |        |                                                                   | G60.3%                                      | Idiopathic progressive neuropathy                                                   |
| Neurogenic bladder                 | 596.54 | Neurogenic bladder NOS                                            | N31.9%                                      | Neuromuscular dysfunction of bladder, unspecified                                   |
|                                    | 337.0x | Idiopathic peripheral autonomic neuropathy                        | G90.0%                                      | Idiopathic peripheral autonomic neuropathy                                          |
| Autonomic neuropathy               | 337.1x | Peripheral autonomic neuropathy in disorders classified elsewhere | G90.8%                                      | Other disorders of autonomic nervous system                                         |
|                                    |        |                                                                   | G90.9%                                      | Disorder of the autonomic nervous system, unspecified                               |
| Gastroparesis (including diabetic) | 536.3x | Gastroparesis                                                     | K31.84%                                     | Gastroparesis                                                                       |
|                                    | 564.5  | Functional diarrhea                                               | E08.43%, E10.43%                            | diabetic autonomic (poly)neuropathy in                                              |

|                                    |        |                                                                   |                  |                                                                                      |
|------------------------------------|--------|-------------------------------------------------------------------|------------------|--------------------------------------------------------------------------------------|
|                                    |        |                                                                   | E11.43%, E13.43% | diabetes mellitus                                                                    |
|                                    | 458.0x | Orthostatic hypotension                                           | I95.1%           | Orthostatic hypotension                                                              |
| Orthostatic hypotension            |        |                                                                   | I95.2%           | Hypotension due to drugs                                                             |
|                                    |        |                                                                   | G90.3%           | Multi-system degeneration of the autonomic nervous system                            |
| <b>Macrovascular complications</b> |        |                                                                   |                  |                                                                                      |
| <b>Cerebrovascular</b>             |        |                                                                   |                  |                                                                                      |
| Stroke - hemorrhage                | 430.xx | Subarachnoid hemorrhage                                           | I60.%            | Nontraumatic subarachnoid hemorrhage                                                 |
|                                    | 431.xx | Intracerebral hemorrhage                                          | I61.%            | Nontraumatic intracerebral hemorrhage                                                |
|                                    | 432.xx | Other and unspecified intracranial hemorrhage                     | I62.%            | Other and unspecified nontraumatic intracranial hemorrhage                           |
| Stroke - ischemic                  | 433.xx | Occlusion and stenosis of precerebral arteries                    | I65.%            | Occlusion and stenosis of precerebral arteries, not resulting in cerebral infarction |
|                                    | 434.xx | Occlusion of cerebral arteries                                    | I63.%            | Cerebral infarction                                                                  |
| TIA                                | 435.xx | Transient cerebral ischemia                                       | G45.%            | Transient cerebral ischemic attacks and related syndromes                            |
| Other cerebrovascular disease      | 436.xx | Acute, but ill-defined, cerebrovascular disease (excluded stroke) | I67.%            | Other cerebrovascular diseases                                                       |
|                                    | 437.xx | Other and ill-defined cerebrovascular disease                     | I68.%            | Cerebrovascular disorders in diseases classified elsewhere                           |
|                                    | 438.xx | Late effects of cerebrovascular disease                           | I69.%            | Sequelae of cerebrovascular disease                                                  |
|                                    |        |                                                                   | G46.%            | Vascular syndromes of brain in cerebrovascular diseases                              |
| <b>Cardiovascular</b>              |        |                                                                   |                  |                                                                                      |

|                                     |        |                                                          |        |                                                                                                                                             |
|-------------------------------------|--------|----------------------------------------------------------|--------|---------------------------------------------------------------------------------------------------------------------------------------------|
| Myocardial infarction (acute)       | 410.xx | Acute myocardial infarction                              | 121.%  | ST elevation (STEMI) and non-ST elevation (NSTEMI) myocardial infarction                                                                    |
|                                     |        |                                                          | 122.%  | Subsequent ST elevation (STEMI) and non-ST elevation (NSTEMI) myocardial infarction                                                         |
|                                     |        |                                                          | 123.%  | Certain current complications following ST elevation (STEMI) and non-ST elevation (NSTEMI) myocardial infarction (within the 28 day period) |
| Other acute IHD                     | 411.xx | Other acute and subacute forms of ischemic heart disease | 124.%  | Other acute ischemic heart diseases                                                                                                         |
| Old myocardial infarction           | 412.xx | Old myocardial infarction                                | 125.2% | Old myocardial infarction                                                                                                                   |
| Angina pectoris                     | 413.xx | Angina pectoris                                          | 120.%  | Angina pectoris                                                                                                                             |
| Other chronic IHD                   | 414.xx | Other forms of chronic ischemic heart disease            | 125.%  | Chronic ischemic heart disease                                                                                                              |
| Atherosclerosis                     | 440.xx | Atherosclerosis                                          | 170.%  | Atherosclerosis                                                                                                                             |
| Aortic aneurysm/dissection          | 441.xx | Aortic aneurysm and dissection                           | 171.%  | Aortic aneurysm and dissection                                                                                                              |
| Other aneurysm                      | 442.xx | Other aneurysm                                           | 172.%  | Other aneurysm                                                                                                                              |
| Arterial embolism and thrombosis    | 444.xx | Arterial embolism and thrombosis                         | 174.%  | Arterial embolism and thrombosis                                                                                                            |
| Atheroembolism                      | 445.xx | Atheroembolism                                           | 175.%  | Atheroembolism                                                                                                                              |
| Ventricular fibrillation            | 427.4x | Ventricular fibrillation and flutter                     | 149.0% | Ventricular fibrillation and flutter                                                                                                        |
| Atrial fibrillation                 | 427.3x | Atrial fibrillation and flutter                          | 148.%  | Atrial fibrillation and flutter                                                                                                             |
| Heart failure                       | 428.xx | Heart failure                                            | 150.%  | Heart failure                                                                                                                               |
| Cardiovascular disease, unspecified | 429.2x | Cardiovascular disease, unspecified                      | 169.9% | Sequelae of unspecified cerebrovascular diseases                                                                                            |

| Peripheral vascular disease                |        |                                                                                              |                                          |                                                                                                 |
|--------------------------------------------|--------|----------------------------------------------------------------------------------------------|------------------------------------------|-------------------------------------------------------------------------------------------------|
| Diabetic PVD                               | 249.7x | Secondary diabetes mellitus with peripheral circulatory disorders                            |                                          |                                                                                                 |
|                                            | 250.7x | Diabetes with peripheral circulatory disorders                                               | E08.5%, E10.5%, E11.5%, E13.5%           | Diabetes mellitus with circulatory complications                                                |
| Other PVD                                  | 443.xx | Other peripheral vascular disease                                                            | I73.%                                    | Other peripheral vascular diseases                                                              |
| Other disorders of arteries and arterioles | 447.xx | Other disorders of arteries and arterioles                                                   | I77.%                                    | Other disorders of arteries and arterioles                                                      |
| Gangrene/Ulcer                             |        |                                                                                              |                                          |                                                                                                 |
| Gangrene in diabetes mellitus              | 250.7x | Diabetes with peripheral circulatory disorders (gangrene)                                    | E08.52%                                  | Diabetes mellitus due to underlying condition with diabetic peripheral angiopathy with gangrene |
|                                            | 249.7x | Secondary diabetes mellitus with peripheral circulatory disorders (diabetic gangrene)        | E10.52%                                  | Type 1 diabetes mellitus with diabetic peripheral angiopathy with gangrene                      |
|                                            |        |                                                                                              | E11.52%                                  | Type 2 diabetes mellitus with diabetic peripheral angiopathy with gangrene                      |
|                                            |        |                                                                                              | E13.52%                                  | Other specified diabetes mellitus with diabetic peripheral angiopathy with gangrene             |
| Foot ulcer                                 | 250.8x | Diabetes with other specified manifestations (any associated ulceration)                     | E08.621                                  | Diabetes mellitus due to underlying condition with foot ulcer                                   |
|                                            | 249.8x | Secondary diabetes mellitus with other specified manifestations ( any associated ulceration) | E10.621                                  | Type 1 diabetes mellitus with foot ulcer                                                        |
| E11.621                                    |        |                                                                                              | Type 2 diabetes mellitus with foot ulcer |                                                                                                 |

|                         |        |                                                     |         |                                                                             |
|-------------------------|--------|-----------------------------------------------------|---------|-----------------------------------------------------------------------------|
|                         |        |                                                     | E13.621 | Other specified diabetes mellitus with foot ulcer                           |
|                         |        |                                                     | L89.5%  | Pressure ulcer of ankle                                                     |
|                         |        |                                                     | L89.6%  | Pressure ulcer of heel                                                      |
| Ulcer of lower limbs    | 707.1x | Ulcer of lower limbs, except pressure ulcer         | L97.%   | Non-pressure chronic ulcer of lower limb, not elsewhere classified          |
| Gas gangrene            | 040.xx |                                                     | A48.0%  | Other bacterial diseases, not elsewhere classified, Gas gangrene            |
| Foot wound              | 892.1x | Open wound of foot except toe(s) alone, complicated | S91.%   | Open wound of ankle, foot and toes                                          |
| Gangrene (not diabetic) | 785.4x | Gangrene                                            | I96.%   | Gangrene, not elsewhere classified (excluded gangrene in diabetes mellitus) |

CSME: cystoid macular edema/degeneration; NOS, not otherwise specified; TIA, transient ischemic attack; IHD, ischemic heart disease; ASCVD, atherosclerotic cardiovascular disease; PVD, peripheral vascular disease; LE, lower extremity.



## Appendix B: Definitions of Comorbidities

| Comorbidities                                                                       | ICD-9                                                                                                       | ICD-10                                                                |
|-------------------------------------------------------------------------------------|-------------------------------------------------------------------------------------------------------------|-----------------------------------------------------------------------|
| Mental illness (substance abuse, schizophrenia, depression, other mental disorders) | 291.0-292.9, 295.0-295.9, 296.0-296.9, 300.4, 301.12, 303.0-305.9, 308.0, 309.0, 309.1, 309.28, 309.81, 311 | F11-F20, F30, F31, F32, F39, F341, F43, F329                          |
| Any cardiovascular disease                                                          | 390-459                                                                                                     | I00-I99                                                               |
| Hypertension                                                                        | 401-405                                                                                                     | I10-I13, I15                                                          |
| Coronary artery disease                                                             | 410-414                                                                                                     | I20-I25                                                               |
| Angina                                                                              | 411, 413                                                                                                    | I20, I24                                                              |
| MI                                                                                  | 410                                                                                                         | I21                                                                   |
| Congestive heart failure (CHF)                                                      | 398.91, 428                                                                                                 | I0981, I50                                                            |
| Peripheral vascular disease                                                         | 443                                                                                                         | I73, I77, I798                                                        |
| Other cardiovascular diseases                                                       | 390-459 (excluding 401-405, 410-414, 428, 398.91, 394-397, 424, 443)                                        | I00-I99 (excluding I10-I13, I15, I20-I25, I0981, I50, I73, I77, I798) |
| Tobacco                                                                             | 305.1, V15.82, 649.0                                                                                        | F17200, Z87891, O9933                                                 |
| Obesity                                                                             | 278                                                                                                         | E66                                                                   |
| Hyperlipidemia                                                                      | 272.0-272.4                                                                                                 | E780 - E785                                                           |
| Renal disease                                                                       | 250.4, 590, 593, 791.0                                                                                      | E1121, E1129, E1165, N110, N28, R803, R809                            |

## Appendix C: Medication category

### 1. Anti-hyperglycemia

#### 1.1. Oral medication

- 1.1.1. Alpha-Glucosidase Inhibitors: Acarbose, Miglitol
- 1.1.2. Biguanides: Metformin
- 1.1.3. DPP-4: Alogliptin, Linagliptin, Saxagliptin, Sitagliptin
- 1.1.4. Glucagon-Like Peptides: Albiglutide, Dulaglutide, Exenatide, Liraglutide
- 1.1.5. Meglitinides: Nateglinide, Repaglinide
- 1.1.6. SGLT2 Inhibitors: Dapagliflozin, Canagliflozin, Empagliflozin
- 1.1.7. Sulfonylureas: Glimepiride, Gliclazide, Glipizide, Glyburide, Chlorpropamide, Tolazamide, Tolbutamide
- 1.1.8. Thiazolidinediones: Rosiglitazone, Pioglitazone

#### 1.2. Insulin

- 1.2.1. Short-acting: Regular (R)
- 1.2.2. Rapid-acting: Insulin aspart, Insulin glulisine, Insulin lispro
- 1.2.3. Intermediate-acting: Insulin isophane
- 1.2.4. Long-acting: Insulin detemir, Insulin glargine

### 2. Anti-Hypertension

#### 2.1. Diuretics:

- 2.1.1. Diuretics: Chlorthalidone, Chlorothiazide, Furosemide, Hydrochlorothiazide, Indapamide, Metolazone
- 2.1.2. Potassium-sparing diuretics: Amiloride hydrochloride, Spironolactone, Triamterene
- 2.1.3. Loop diuretic: Bumetanide

- 2.2. Beta-blocker: Acebutolol, Atenolol, Betaxolol, Bisoprolol fumarate, Carteolol hydrochloride, Metoprolol tartrate, Metoprolol succinate, Nadolol, Penbutolol

sulfate, Penbutolol sulfate, Pindolol, Propranolol hydrochloride, Solotol hydrochloride, Timolol maleate

- 2.3. ACE inhibitors: Benazepril hydrochloride, Captopril, Enalapril maleate, Fosinopril sodium, Lisinopril, Moexipril, Perindopril, Quinapril hydrochloride, Ramipril, Trandolapril
- 2.4. Angiotensin II receptor blockers: Candesartan, Eprosartan mesylate, Irbesartan, Losartan potassium, Telmisartan, Valsartan
- 2.5. Calcium channel blockers: Amlodipine besylate, Bepridil, Diltiazem hydrochloride, Felodipine, Isradipine, Nicardipine, Nifedipine, Nisoldipine, Verapamil hydrochloride
- 2.6. Alpha blockers: Doxazosin mesylate, Prazosin hydrochloride, Terazosin hydrochloride
- 2.7. Alpha-2 Receptor Agonist: Methyldopa
- 2.8. Central agonists: Alpha methyldopa, Clonidine hydrochloride, Guanabenz acetate, Guanfacine hydrochloride
- 2.9. Peripheral adrenergic inhibitors: Guanadrel, Guanethidine monosulfate, Reserpine
- 2.10. Blood vessel dilators (vasodilators): Hydralazine hydrochloride, Minoxidil

### 3. Lipid Lowering Medication

- 3.1. Statins: Atorvastatin, Fluvastatin, Pravastatin, Rosuvastatin Calcium, Simvastatin
- 3.2. Niacin: Omega-3 Fatty Acid Ethyl Esters, Marine-Derived Omega-3 Polyunsaturated Fatty Acids
- 3.3. Bile-acid resins: Cholestyramine, Colestipol, Colesevelam Hcl
- 3.4. Fibric acid derivatives: Gemfibrozil, Fenofibrate, Clofibrate
- 3.5. Cholesterol absorption inhibitors

## Appendix D: Flow Chart of Sample Selection

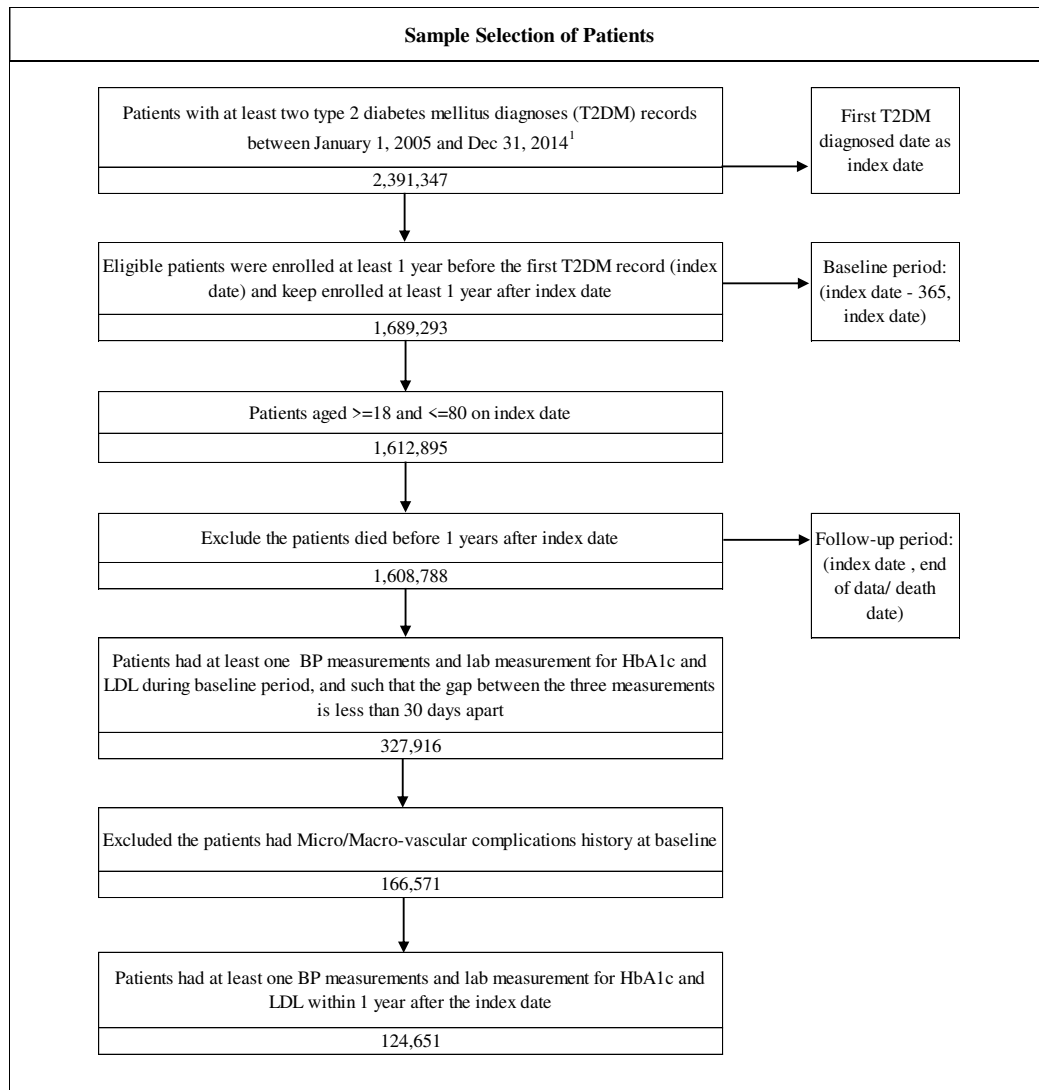

### Appendix E: A1C Targets of intensive and standard glycemc control groups in major RCTs

|                 | Intensive treatment                                                                  | Standard treatment                                                   |
|-----------------|--------------------------------------------------------------------------------------|----------------------------------------------------------------------|
| UKPDS-33        | 7% -> 7%                                                                             | 7.9%                                                                 |
| UKPDS-34        | 7% ->7.4%                                                                            | 8%                                                                   |
| ACCORD          | Target at 6.0%<br>8.1% -> 6.4% (3.5 yrs follow-up)<br>8.1% -> 7.2% (5 yrs follow-up) | 7.5%<br>7.6%                                                         |
| ADVANCE         | Target at 6.5%<br>7.5% -> 6.5%                                                       | 7.3%                                                                 |
| STENO-2         | 8.4% -> 7.9%                                                                         | 8.8% -> 9.0% (received intensive treatment at 2 <sup>nd</sup> stage) |
| VADT            | 9.4% -> 6.9%                                                                         | 9.4% -> 8.4%                                                         |
| ORIGIN          | 6.4% -> 6.5%                                                                         | 6.2%                                                                 |
| ADDITION-Europe | Target at <7%                                                                        | Routine care                                                         |

## Appendix F: Medication usage and Prevalence of Clinical Outcomes in follow-up period

### Medication usage

In the follow-up period, 21.48% of patients (27,462) were identified as insulin users and the average percentage of coverage was 77.85%, while 74.19% (98,662) used at least one oral anti-diabetic medication. 85.13% (113,224) of patients had received anti-hypertension medication and 80.75% (107,390) had had lipid lowering drugs.

(Figure 1)

Figure 1: Prescription Rates of Major Classes of Medication Treatments and Percentage of Coverage of Insulin

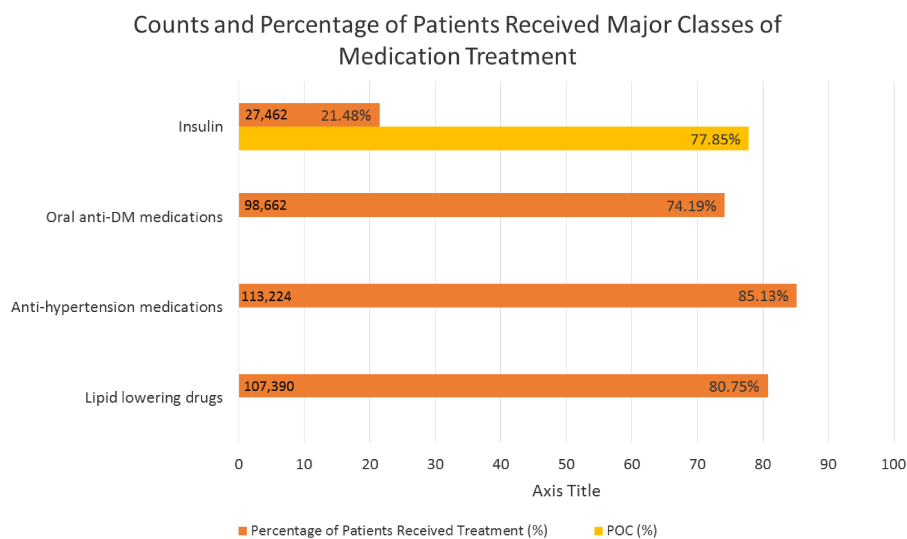

This figure (**Figure 2**) was shown the ranking the oral anti-diabetic medication use rate. The biguanides was most widely used (64.13%) and patients who received biguanides were covered 51.35% time of follow-up period averagely. Sulfonylureas and thiazolidinedione were the second and third frequently used anti-diabetic medications. 41.19% and 6.66% of patients were prescribed and covered 43.09% and 24.47% of follow-up period respectively. Only about 2% patients used DPP-4 and Alpha-Glucosidase Inhibitors, while the less than 1% patients were prescribed Glucagon-Like Peptides agonists, meglitinides and SGLT2 Inhibitors.

Figure 2: Prescription Rates of Classes of Anti-Diabetic Medication and Percentages of Coverage

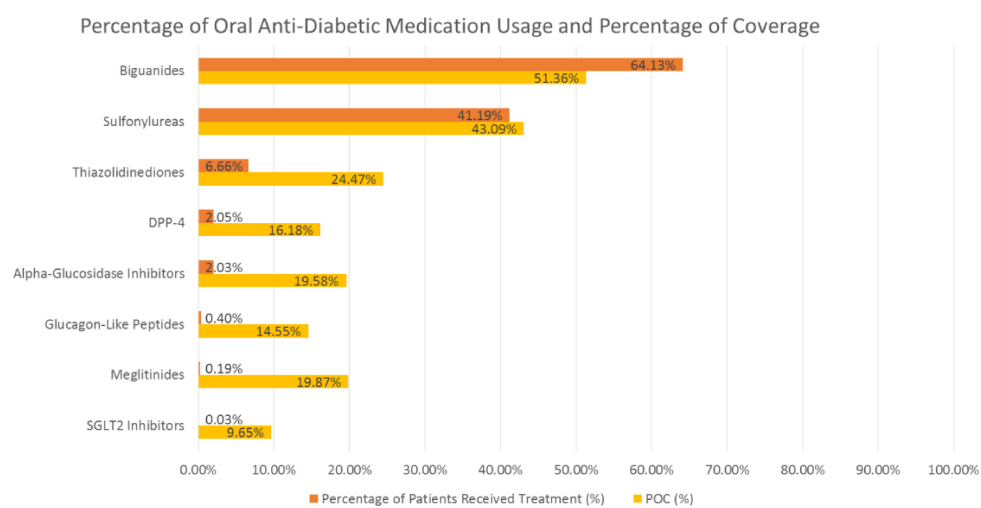

ACE Inhibitors, Diuretics, Beta-blocker and Calcium channel blockers were top 4 most frequently used anti-hypertension medications, which were used among 65.11%, 57.52%, 37.96% and 31.51% respectively. The percentage of coverage of patients who have ever been prescribed Diuretics reached 99.41%, while all the other three drug were between 50.20% and 54.91%. Small percentage of patients used Angiotensin II receptor blockers or Alpha blockers, which were 5.52% and 3.82% respectively. And less than 1% patients were prescribed blood vessel dilators, Alpha-2 receptor agonist and or peripheral adrenergic inhibitors (0.50%, 0.06%, and 0.03% respectively). (**Figure 3**)

Figure 3: Prescription Rates of Classes of Anti-Hypertension Medications and Percentages of Coverage

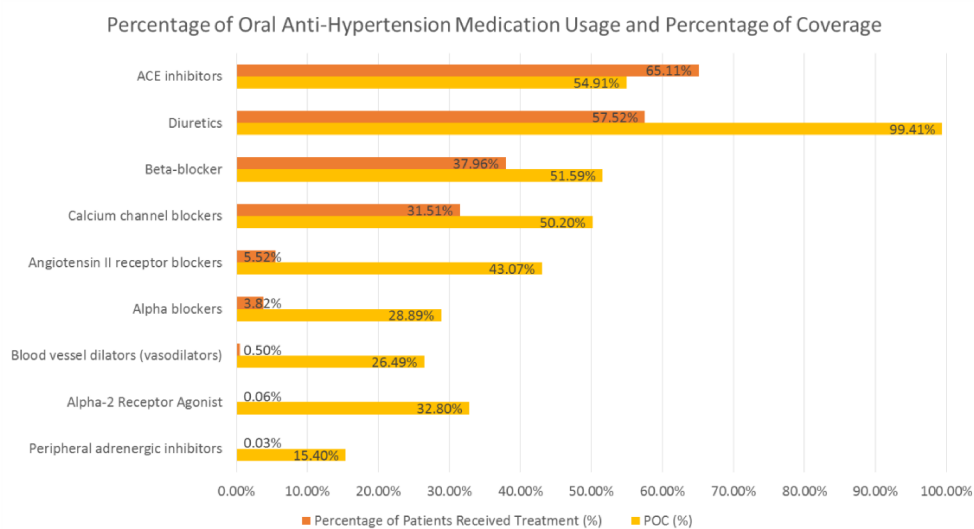



78.03% of patients used statins and the treatment covered 54.07% of follow-up period. And 12.82% and 3.28% of patients used fibric acid derivatives and bile-acid resins as lipid lowering medication and were covered by the treatment 34.62% and 14.63% time of whole follow-up period respectively. (Figure 4)

Figure 4: Prescription Rates of Classes of Lipid Lowering Medications and Percentages of Coverage

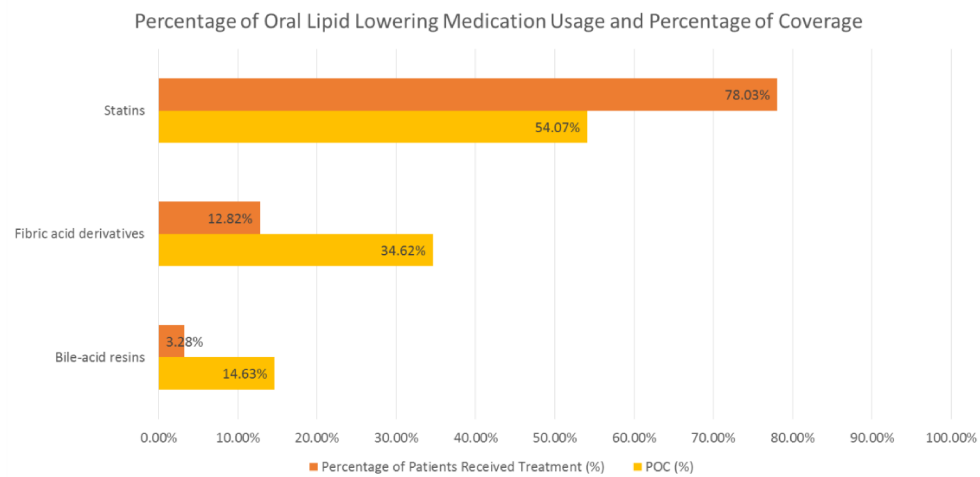

## Prevalence of Clinical Outcomes

Out of total 124,651 patients, 43,890 (35.21%) patients had at least one microvascular complication during the follow-up period, which included 12,615 (10.12%) retinopathy, 8,863 (7.11%) nephropathy, and 32,833 (26.34%) neuropathy. 10.68% of patients had the first diagnosis of microvascular complication at the first year after index date, while 6.34% happened at second year, 4.66% at third year, and 13.54% happened after 3-year of post-index.

Out of 124,651 patients, 40,798 (32.73%) patients had at least one macrovascular complication during the follow-up period, which included 25,504 (20.46%) patients with CAD, 13,138(10.54%) patients with cerebrovascular disease, 12,066 (9.68%) patients with PVD, and 8239 (6.61%) AAE. 10.78% of total patients had the first diagnosis of macrovascular complication at the first year after index date, while 5.55% happened at second year, 4.17% at third year, and 12.24% happened after 3- year of post-index.

During the whole follow-up period, 22,524 patients died (18.07%). Patients died at the first year of post-index have been excluded from this study. 2456 (1.97%) patients were found died at the second year after index date, while 2630 (2.11%) death occurred at the third year of post-index, and 17,439 (13.99%) patients died after three years of post-index. (**Table 1**)

Table 1: Prevalence of Clinical Outcomes and the Proportions of First Event Occurrence Year

|                                    | Whole follow-up period |        | 1-year Post-index |        | 2-year Post-index |       | 3-year Post-index |       | >3-year Post-index |        |
|------------------------------------|------------------------|--------|-------------------|--------|-------------------|-------|-------------------|-------|--------------------|--------|
|                                    | n                      | %      | n                 | %      | n                 | %     | n                 | %     | n                  | %      |
| <b>N=124651</b>                    |                        |        |                   |        |                   |       |                   |       |                    |        |
| <b>Microvascular Complications</b> | 43890                  | 35.21% | 13313             | 10.68% | 7903              | 6.34% | 5809              | 4.66% | 16878              | 13.54% |
| <b>Retinopathy</b>                 | 12615                  | 10.12% | 4276              | 3.43%  | 2306              | 1.85% | 1683              | 1.35% | 4350               | 3.49%  |
| <b>Nephropathy</b>                 | 8863                   | 7.11%  | 3041              | 2.44%  | 1633              | 1.31% | 1147              | 0.92% | 3041               | 2.44%  |
| <b>Neuropathy</b>                  | 32833                  | 26.34% | 10346             | 8.30%  | 6046              | 4.85% | 4325              | 3.47% | 12116              | 9.72%  |
| <b>Macrovascular Complications</b> | 40798                  | 32.73% | 13437             | 10.78% | 6918              | 5.55% | 5198              | 4.17% | 15257              | 12.24% |
| <b>CAD</b>                         | 25504                  | 20.46% | 9685              | 7.77%  | 4363              | 3.50% | 3129              | 2.51% | 8327               | 6.68%  |
| <b>Cerebrovascular disease</b>     | 13138                  | 10.54% | 4575              | 3.67%  | 2194              | 1.76% | 1658              | 1.33% | 4712               | 3.78%  |
| <b>PVD</b>                         | 12066                  | 9.68%  | 4450              | 3.57%  | 2082              | 1.67% | 1458              | 1.17% | 4076               | 3.27%  |
| <b>AAE</b>                         | 8239                   | 6.61%  | 2879              | 2.31%  | 1433              | 1.15% | 1060              | 0.85% | 2879               | 2.31%  |
| <b>Death</b>                       | 22524                  | 18.07% | n/a               | n/a    | 2456              | 1.97% | 2630              | 2.11% | 17439              | 13.99% |

\*Follow-up time= 1st diagnosed date-index date; Years of follow-up was rounded up
